# Supplementary material
Source: PubMed Central journal article supplement (PMC9472608)
Supplement: jvi.01140-22-s0001.pdf [file jvi.01140-22-s0001.pdf]

1 **Supplementary Materials for**

2  
3 **Characterization of entry pathways, species-specific ACE2 residues determining entry, and**  
4 **antibody neutralization evasion of Omicron BA.1, BA.1.1, BA.2, and BA.3 variants**

5  
6 Sabari Nath Neerukonda, Richard Wang, Russell Vassell, Haseebullah Baha, Sabrina Lusvarghi,  
7 Shufeng Liu, Tony Wang, Carol D. Weiss \*, and Wei Wang \*

8  
9 US Food and Drug Administration, Office of Vaccine Research and Review, Center for  
10 Biologics Evaluation, Research and Review, Silver Spring, Maryland, United States of America

11  
12 **\*: Correspondence:** [wei.wang@fda.hhs.gov](mailto:wei.wang@fda.hhs.gov) (W.W) and [carol.weiss@fda.hhs.gov](mailto:carol.weiss@fda.hhs.gov) (C.D.W)

13  
14  
15  
16 **This PDF file includes:**

17 Supplementary Figures and Figure legends

## Supplementary Figures and Figure legends

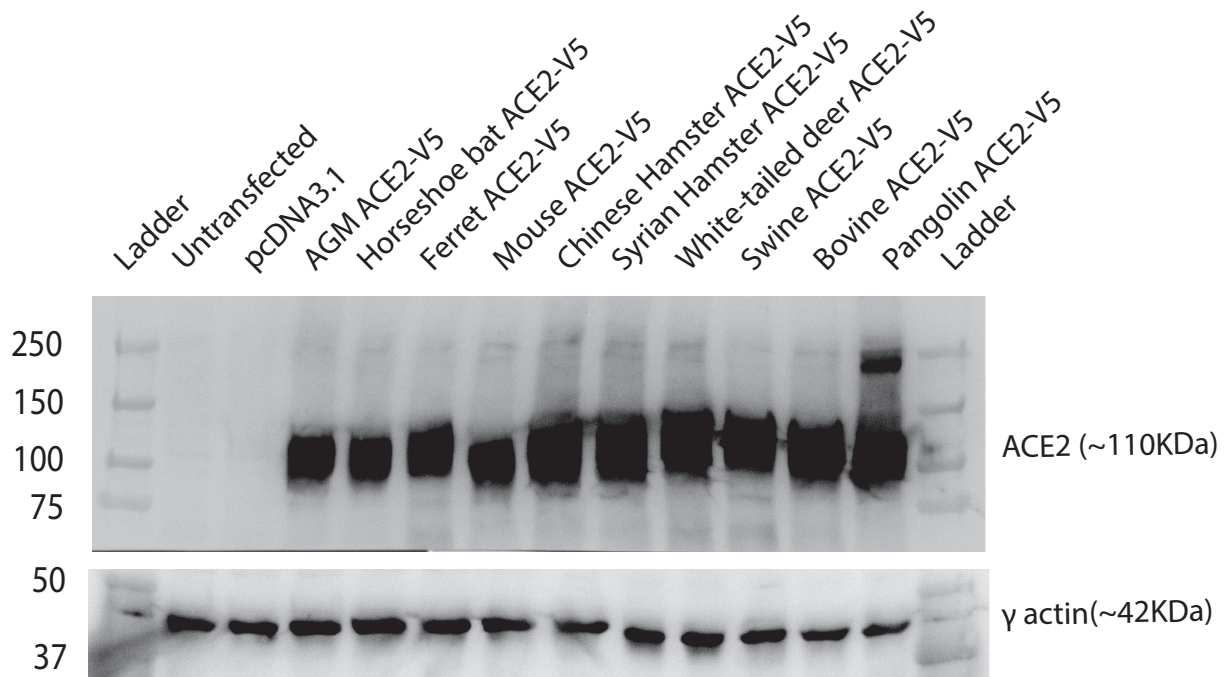

**Figure S1. Transient expression of variant species ACE2.** Western blotting of V5-tagged ACE2 proteins belonging to different species using Anti-V5 Tag antibody. Cellular control is  $\gamma$ -actin.

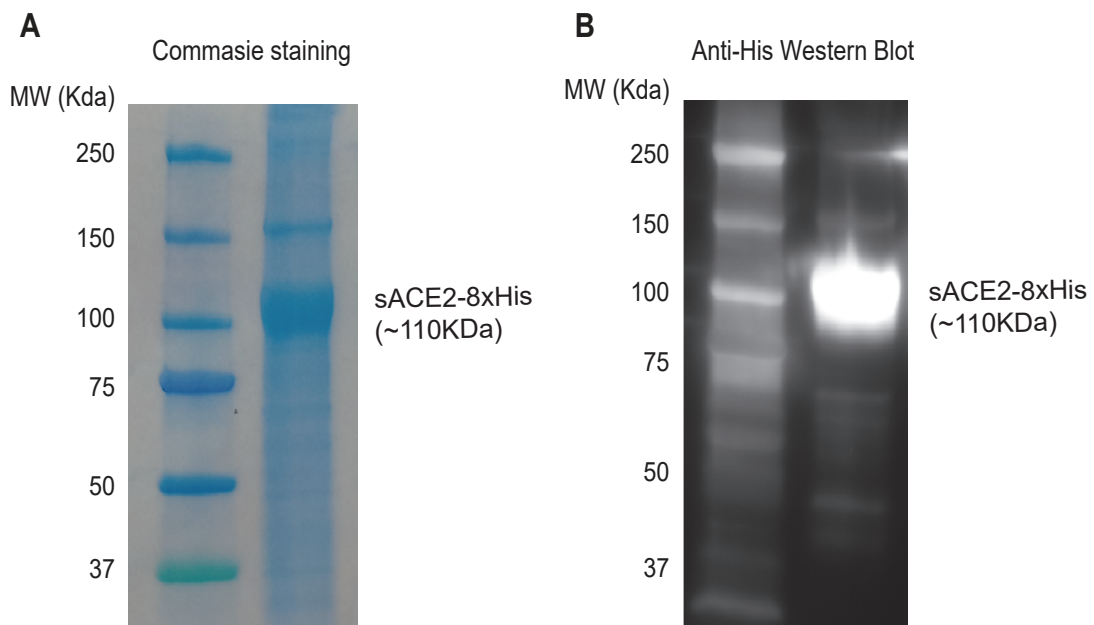

**Figure S2. The detection of purified soluble human ACE2.** **A.** Coomassie staining of purified soluble ACE2 (sACE2-8XHis) protein. **B.** Western blotting of sACE2-8XHis protein using Anti-6xHis Tag antibody.
